# Supplementary material for: Mesoporous carbon-imbedded W2C composites as flexible counter electrodes for dye-sensitized solar cells
Source: Royal Society of Chemistry journal article supplement (doi:10.1039/c6tc01601d), 2016-01-01
Supplement: c6tc01601d1.pdf [file c6tc01601d1.pdf]

## Supplementary Information

### Mesoporous carbon-imbedded $W_2C$ composite as flexible counter electrodes for dye-sensitized solar cells

Ling Li,<sup>a</sup> Huidong Sui,<sup>a</sup> Wenming Zhang,<sup>a\*</sup> Xiaowei Li,<sup>a</sup> Kun Yang,<sup>b\*</sup> Anders Hagfeldt<sup>c</sup> and Mingxing Wu<sup>d\*</sup>

<sup>a</sup> Hebei Key Lab of Optic-electronic Information and Materials, College of Physics Science and Technology, Hebei University, Baoding, 071002, P. R. China. E-Mail: [wmzhanghbu@163.com](mailto:wmzhanghbu@163.com)

<sup>b</sup> College of Quality and Technical Supervision, Hebei University, Baoding, 071000, China, P. R. China. E-mail: [hbuyangkun@163.com](mailto:hbuyangkun@163.com).

<sup>c</sup> Laboratory for Photomolecular Science (LSPM), Swiss Federal Institute of Technology at Lausanne (EPFL), CH-1015 Lausanne, Switzerland

<sup>d</sup> Key Laboratory of Inorganic Nano-materials of Hebei Province, College of Chemistry and Material Science, Hebei Normal University, Shijiazhuang, 050024, China. Tel. & Fax: +86-311-80787438, E-mail: [mingxing.wu@mail.hebtu.edu.cn](mailto:mingxing.wu@mail.hebtu.edu.cn)

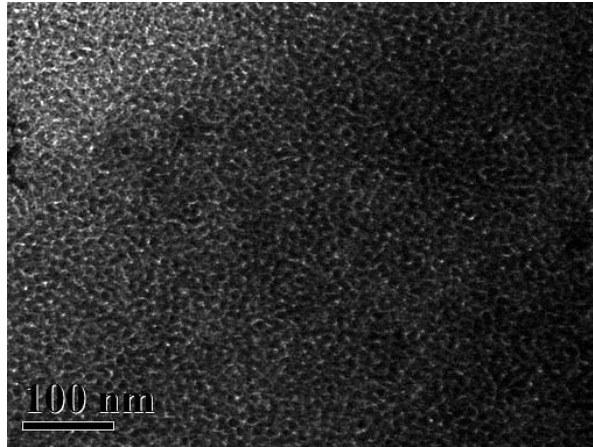

**Fig. S1** TEM image of the prepared mesoporous carbon.

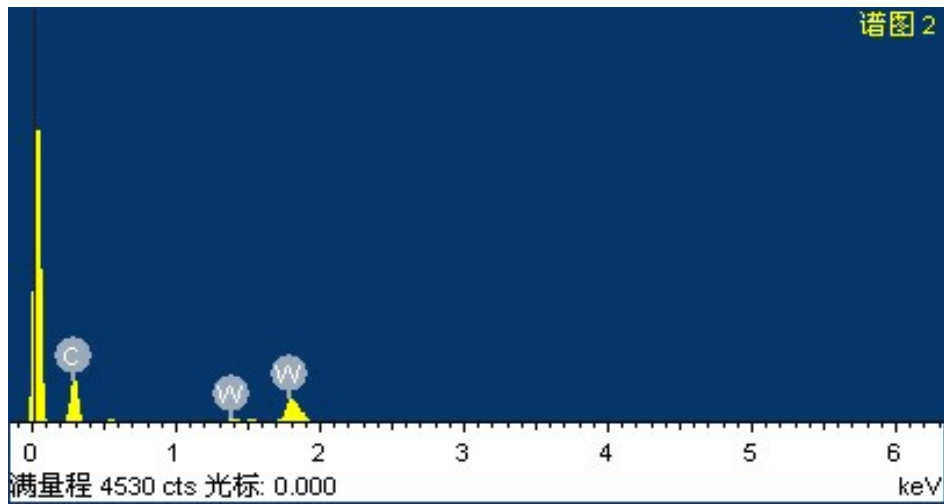

**Fig. S2** EDS of prepared W<sub>2</sub>C/MC

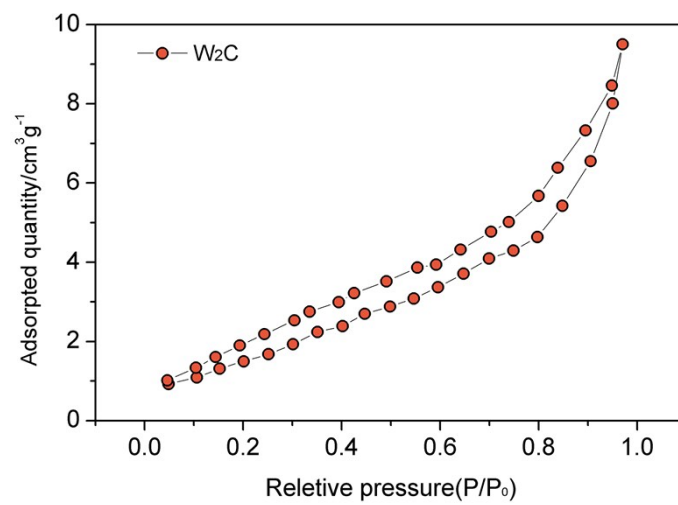

**Fig. S3** The N<sub>2</sub> sorption isotherm of W<sub>2</sub>C.

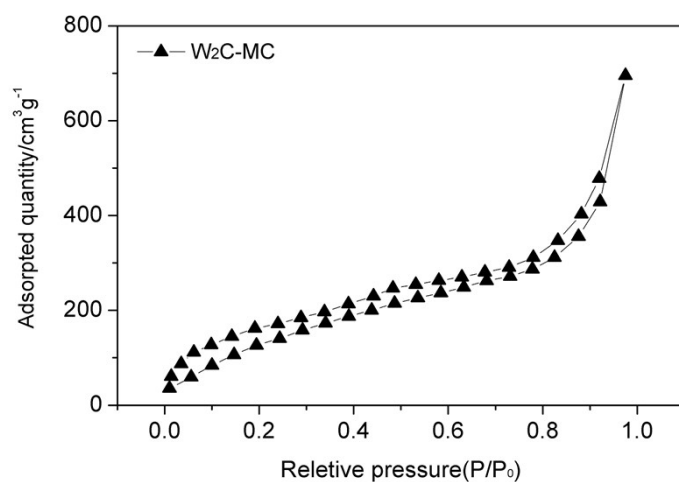

**Fig. S4** The  $N_2$  sorption isotherm of  $W_2C/MC$ .

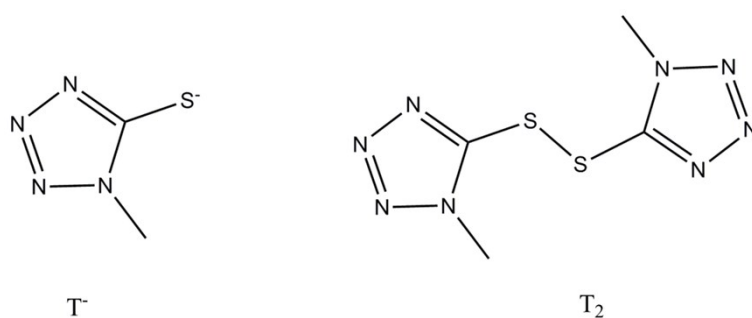

**Fig. S5** Molecular structure of  $T^-$  and  $T_2$ .

**Table S1** Photovoltaic parameters of the iodide electrolyte based-DSCs using MC,  $W_2C$ , and  $W_2C/MC$  counter electrodes.

| Counter electrodes | $V_{oc}/mV$ | $J_{sc}/mA\ cm^{-2}$ | $FF$  | PCE/% |
|--------------------|-------------|----------------------|-------|-------|
| MC                 | 728         | 14.86                | 0.603 | 6.44  |
| $W_2C$             | 726         | 13.59                | 0.648 | 6.40  |
| $W_2C/MC$          | 744         | 15.23                | 0.672 | 7.61  |

$V_{oc}$ : open-circuit voltage,  $J_{sc}$ : short-circuit current density, FF: fill factor, PCE: power conversion efficiency.
